## Honey bee queen production:

### *Canadian costing case study and profitability analysis*

Miriam Bixby<sup>1,2</sup> Shelley E. Hoover<sup>3</sup> Robyn McCallum<sup>4</sup> Abdullah Ibrahim<sup>5</sup> Lynae Ovinge<sup>3</sup> Sawyer Olmstead<sup>4</sup> Stephen F. Pernal<sup>5</sup> Amro Zayed<sup>6</sup> Leonard J. Foster<sup>1</sup> M. Marta Guarna<sup>5</sup>

<sup>1</sup>Department of Biochemistry & Molecular Biology, University of British Columbia, 2125 East Mall, Vancouver, BC, Canada V6T 1Z4, (miriambixby@gmail.com, foster@mssl.ubc.ca), <sup>2</sup>Corresponding author, e-mail: miriambixby@gmail.com, <sup>3</sup>Alberta Agriculture and Forestry, Agriculture Centre, 100, 5401- 1 Ave., South, Lethbridge, AB, T1J 4V6, Canada (shelley.hoover@gov.ab.ca, Lynae.Ovinge@gov.ab.ca), <sup>4</sup>Atlantic Tech Transfer Team for Apiculture, 199 Dr. Bernie MacDonald Drive, Bible Hill, Nova Scotia, Canada, B6L 2H5 (rmccallum@perennia.ca, solmstead@perennia.ca), <sup>5</sup>Agriculture & Agri-Food Canada, Beaverlodge Research Farm, Box PO 29, Beaverlodge, Alberta T0H 0C0, Canada (Abdullah.Ibrahim@Canada.ca, Steve.Pernal@Canada.ca, Marta.Guarna@Canada.ca), <sup>6</sup> Department of Biology, York University, Lumbers Building #208, 4700 Keele Street, Toronto, Ontario M3J 1P3, Canada (zayed@yorku.ca).

#### Abstract

The recent decline in honey bee (Hymenoptera: Apidae) colony health worldwide has had a significant impact on the beekeeping industry as well as on pollination-dependent crop sectors in North America and Europe. The pollinator crisis has been attributed to many environmental and anthropological factors including less nutrient rich agricultural monocultures, pesticide exposure, new parasite and pathogen infestations as well as beekeeper management and weather. Canadian beekeepers have indicated that issues with honey bee queens are the most significant factor affecting their colony health. In Canada, beekeepers manage colony losses by relying on the importation of foreign bees, particularly queens from warmer climates, to lead new replacement colonies. Unfortunately, the risks associated with imported queens include the introduction of new and potentially resistant pests and diseases, undesirable genetics including bees with limited adaptations to Canada's unique climate and bees negatively affected by transportation. Importing a large proportion of our queens each year also creates an unsustainable dependency on foreign bee sources, putting our beekeeping and pollination sectors at an even greater risk in the case of border closures and restrictions. Increasing the domestic supply of queens is one mitigation strategy that could provide Canadian beekeepers, farmers and consumers with a greater level of agricultural stability through locally bred, healthier queens. Our study is the first rigorous analysis of the economic feasibility of Canadian queen production. We present the costs of queen production for three case study operations across Canada over two years as well as the profitability implications. Our results show that for a small to medium sized queen production operation in Canada, producing queen cells and mated queens can be profitable. Using a mated queen market price ranging from \$30 to \$50, a producer selling mated queens could earn a profit of between \$2 and \$40 per queen depending on price and the cost structure of his operation. If the producer chose to rear queens for his own operation, the cost savings would also be significant as imported queen prices continue to rise. Our case studies reveal that there is potential for both skilled labour acquisition over time in queen production as well as cost savings from economies of scale. Our queen producers also reduced their production costs by re-using materials year to year. Domestic queen production could be one viable strategy to help address the current pollinator crisis in Canada.

**Key Words:** Honey bees, economics, queen breeding, honey bee importation, beekeeper profit.

## 48 **Introduction**

49 Honey bees play an important role in both natural and managed ecosystems through their  
50 pollination services to flowering plants. As such, they contribute substantially to the production  
51 of food crops: over a third of global food crop species increase yield as a function of animal  
52 pollination, primarily by bees (Klein et al. 2007). In Canada, managed honey bee colonies (*Apis*  
53 *mellifera* L.) contribute to the pollination of many crops including tree fruits, berries, cucurbits,  
54 and oil seeds, especially production of hybrid canola seed. In 2016, honey bee contribution to  
55 Canadian food crops was estimated at \$4-\$5.5 billion (HCSDA 2017). Canadian beekeepers  
56 managed 803,352 colonies over the 2018-2019 season (CAPA 2019), an increase of over 16,000  
57 colonies from the previous year, however, beekeeper revenues have been decreasing due to  
58 falling honey prices (Phipps 2017) and increased colony mortality (CAPA 2019).

59  
60 Colony mortality has been a concern worldwide for several years, with U.S. beekeepers reporting  
61 38% colony mortality over the 2018-2019 winter, the highest winter loss in recent history (BIP  
62 2019). Canadian honey bee colony winter mortality has also been significant throughout the past  
63 decade (Fig 1). Losses of Canadian honey bee colonies over the recent 2018-2019 winter season  
64 was 25.7%, ranging by province from 19% to 54% (CAPA 2019). 2018-2019 colony mortality  
65 follows the previous year's losses which reached 32%, the second highest mortality on record  
66 since 2008 (CAPA 2019) and more than double the 15% yearly loss that is considered  
67 sustainable by apiculturists (Fig. 1) (Furgala and McCutcheon 1992, vanEngelsdorp et al. 2007).  
68 Causes of colony mortality are multifaceted (Currie et al. 2010, Potts et al. 2010, vanEngelsdorp  
69 2013) with the predominant factors being queen health and queen age (Genersch et al. 2010,  
70 Spleen et al. 2013, vanEngelsdorp 2013, Liu, et al. 2016). In a recent survey, Canadian

71 beekeepers reported that queen issues were the most important factor contributing to colony  
72 mortality (Fig. 2). Despite the significant colony losses, beekeepers are able to mitigate high  
73 colony mortality by splitting their colonies each spring and installing new queens. These new  
74 queens can be reared by the beekeepers themselves, by other local beekeepers or can be  
75 imported. Beekeepers can import queens alone, or as *package bees*, which are comprised of 1-1.5  
76 kg of worker bees with a newly-mated queen.

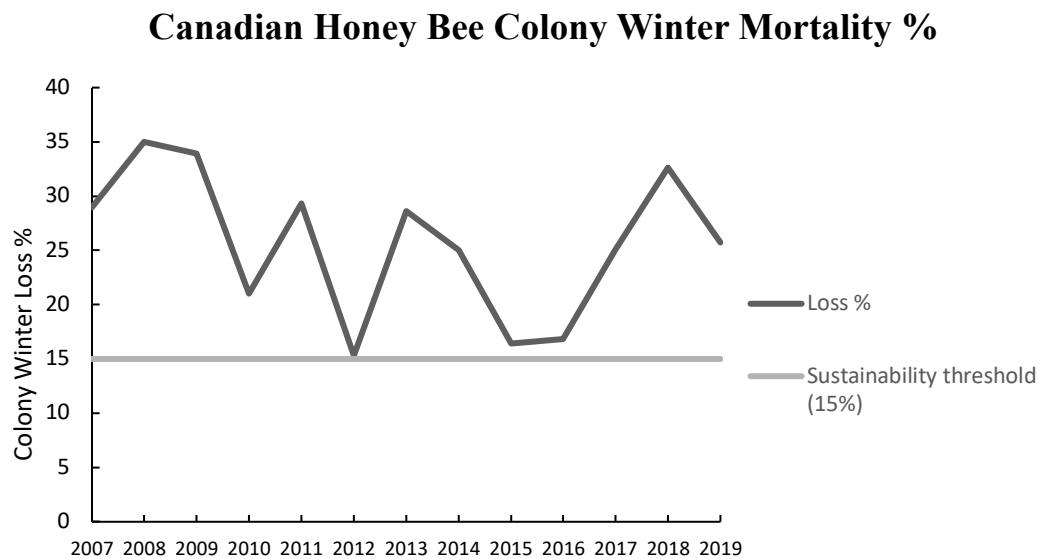

77  
78 **Figure 1.** Canadian honey bee colony winter losses over the past decade as reported by the Canadian Association of  
79 Professional Apiculturists (CAPA 2019).

## Causes of colony losses according to beekeepers 2014-2016

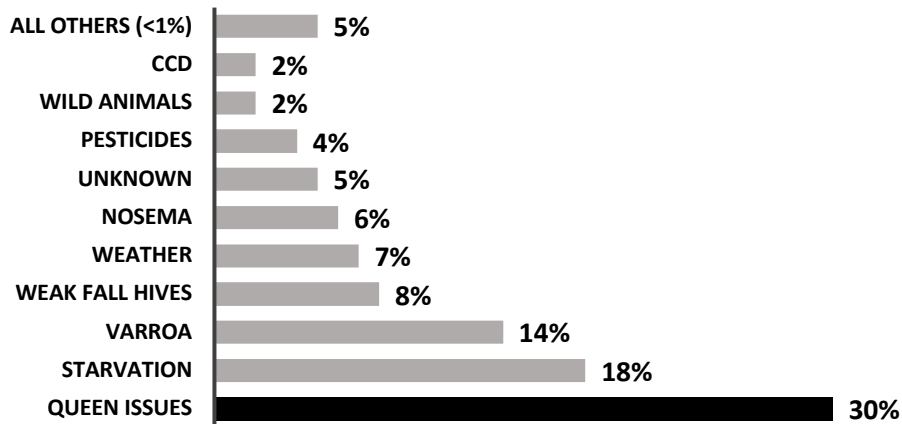

80

81 **Figure 2.** Canadian survey data on beekeeper reported causes of colony mortality in their apiaries through the 2014-  
82 2016 seasons (Bixby et al. 2019).

83

84 There are an estimated 250-500 beekeepers in Canada who produce queens to supply their own  
85 operations and/or sell to other Canadian beekeepers (Bixby et al. 2019). Provincial survey data  
86 from 2017-2018 suggests that approximately 100,000 queens were produced in Canada (BCBPS  
87 2016, QIS 2018), a fraction of what is required to support the national population of over  
88 800,000 Canadian colonies (CAPA 2019). Despite the critical role that queen bees play in  
89 sustaining Canada's beekeeping and agricultural sectors, there has been no formal investigation  
90 into the economic details of queen bee breeding operations in Canada and no systematic national  
91 record keeping of the number of breeders or queens being produced and sold in Canada. Based  
92 on survey data (Bixby et al. 2019) and importation statistics (Page, 2017), we know that  
93 domestic Canadian queen supply has historically not met demand, particularly in the early  
94 spring, and as a result Canada's beekeeping community has developed a strong culture of queen  
95 importation. Large numbers of queens are imported in the spring from warmer climates such as

96 California where breeding can be done much earlier than northern climates. Queens are also  
97 imported from regions with contra-seasonal weather such as New Zealand and Australia as well  
98 as from aseasonal climates such as Hawaii where queens are reared year-round. In 2018,  
99 Canadian beekeepers imported 262,118 queens from Hawaii, California, Chile, Australia and  
100 New Zealand (Page 2017) to establish new colonies or to re-queen existing units.  
101  
102 Queen importation, however, is a double-edged sword, simultaneously supplying essential  
103 resources for our beekeeping and pollination sectors while risking the introduction of new and  
104 potentially resistant pests and diseases, undesirable genetics including bees with limited  
105 adaptations to Canada's unique climate and conditions and/or bees negatively affected by  
106 transportation. During transportation, queens can be exposed to temperature extremes that may  
107 affect their stored sperm, which in turn can reduce laying success and ultimately impact colony  
108 productivity (CFIA 2013, Pettis et al. 2016). Canada's dependency on foreign queen sources also  
109 imposes another potential risk on our beekeeping and other agricultural sectors as prohibitions to  
110 importation could result in Canadian beekeepers facing the sudden loss of a quarter of a million  
111 queens that the industry is currently unprepared to supply domestically. This is a scenario that  
112 Canada narrowly escaped from in 2008 after *varroa* was discovered in Hawaii and again in 2010  
113 after the small hive beetle (*Aethina tumida* Murray), was also found in Hawaii (CAPA 2008,  
114 CAPA 2010). Accompanying the risks of importation and the increasing awareness of these risks  
115 within the Canadian beekeeping community, has been an unprecedented rise in the prices of  
116 imported queen bees from \$7.50 in 1988 to \$32.50 in 2017, an increase of 333%. Inflation alone  
117 accounts for an increase of only 80% (BOC 2019), resulting in a significant real price jump for  
118 the beekeeping industry (Figure 3). Adjusting for inflation, real prices rose from just over \$12

119 per imported queen in 1988 up to over \$32 per imported queen in 2017. Colony health issues  
120 related to imported queens, risks associated with importation, and rising imported queen prices  
121 are factors that are concurrently driving an increase in the demand for local queens (Bixby et al.  
122 2019).

### Prices of queens imported into Canada (1988-2017)

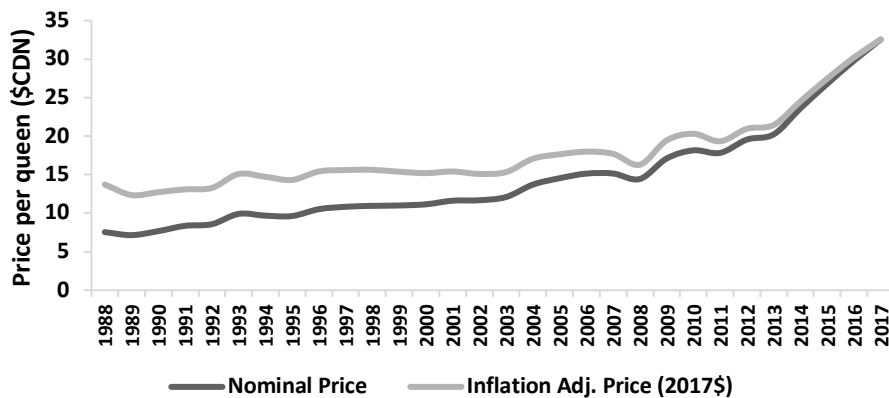

123  
124 **Figure 3.** Nominal and real (inflation adjusted) prices for imported queens into Canada 1988-2017 (Page 2017).

125  
126 Honey bees are social insects with a complex division of labour, which includes the queen who  
127 is the sole reproductive female in the colony. The queen mates with between 8-25 drones  
128 (males), with an average of approximately 14 drones, over several mating flights (Simone-  
129 Finstrom and Tarpy 2018). These mating flight(s) occur very early in her adult life and she stores  
130 sperm in her spermatheca for the remainder of her life. To maintain the required worker  
131 population, a queen will lay up to 1500 fertilized eggs per day (Winston 1987, Moore et al.  
132 2019), and the resulting female worker bees in the colony are tasked with all non-reproductive  
133 colony duties, including caring for the queen, nursing brood, cleaning, and foraging for food. As  
134 a result of this matriarchal familial system, the quality of the queen has a direct impact on the  
135 colony's health, productivity and ultimately survival (Nelson and Smirl 1977, Tarpy et al. 2000,

136 Tarpy et al. 2012, Rangel et al. 2013, Simeunovic et al. 2014, Amiri et al. 2017, Eccles et al.  
137 2017). Rearing a queen can involve a rigorous selection process to ensure the new queen carries  
138 desirable attributes. This type of selective queen breeding is a specialized skill performed by a  
139 small subset of beekeepers. These breeders select for a set of criteria such as honey production,  
140 varroa resistance, wintering performance, hygienic behaviour, and/or temperament. Selection  
141 usually takes place in the field through specialized phenotypic testing and/or observations of  
142 colony performance, however, new laboratory-based testing tools are beginning to reach the  
143 market and may soon significantly impact the queen breeding industry in Canada and worldwide  
144 (Guarna et al. 2017). These tools would require only a small sample of a colony's workers to be  
145 tested for markers corresponding to specific traits, a much less resource intensive selection  
146 process.

147  
148 As described in Laidlaw and Page (1997), queen rearing requires that the queen producer follow  
149 a generalized breeding procedure. Once the queen and drone mother colonies are selected, a  
150 process that can be done by the queen producer or within a separate breeding program which  
151 then provides the selected genetics to the queen producing beekeeper who uses a queenless cell  
152 starter colony to rear queen cells. One-day-old larvae from the selected mother colony are  
153 grafted into queen cups and placed into the cell starter colony for the nurse bees to rear (swarm  
154 boxes filled with nurse bees are an alternative to starter colonies used by some Canadian  
155 producers). After 24-48 hours, depending on the method, the queen cells are moved into a  
156 finishing colony (unless using a combined starter-finisher colony) where they will be reared for  
157 eight days until they are ready to be sold as queen cells or introduced into small, queenless  
158 colonies (mating nuclei) to be mated. Setting up the mating yard(s) requires a significant labour

159 investment and is a critical component in the queen production process. These steps of queen  
160 production result in daughter queens that can be used in the originating operation or sold to other  
161 beekeepers (Van Alten et al. 2013). Alternatively, a colony can contribute to the production of  
162 mated queens by acting as a drone source colony for mating with virgin queens. For the purpose  
163 of this manuscript, a ‘queen breeding or production operation’ refers to an operation that is  
164 involved in queen production regardless of the method used to select breeder queens.

165  
166 The risks and costs associated with queen importation can be mitigated by the development of a  
167 strong, domestic queen production industry in Canada. Since an important but limited attempt in  
168 1994 (Gates et al. 1994), there have been no rigorous studies delineating the activities of queen  
169 breeding operations, assigning breeding and production costs, and examining the profit  
170 implications for the industry. In this paper we present the first comprehensive Canadian queen  
171 production costing case study. We tracked three domestic beekeeping operations over two years,  
172 and explored the profitability of queen production given current prices and various levels of  
173 queen production experience as well as variable queen grafting and mating success rates. This  
174 study provides the economic foundation necessary to support the expansion of Canada’s queen  
175 production sector, providing a sustainable source of queens for our beekeeping and agricultural  
176 industries.

177

## 178 Materials and Methods

179

180 We chose three queen breeding operations in Canada each led by an apicultural researcher (with  
181 a range of queen production experience) to ensure systematic data collection. Each operation was



182 managed independently and according to the researcher's own set of criteria. The first operation,  
183 OP1, was located near Moncton, New Brunswick in Atlantic Canada where historically there has  
184 not been a large honey bee queen production industry. OP1 is itself a large beekeeping operation  
185 in eastern Canada that produces several hundred splits each summer with a focus to pioneer  
186 rigorous breeding research in eastern Canada using a relatively large number of colonies. The  
187 operation was led by apicultural researchers with in-depth beekeeping knowledge but limited  
188 queen breeding experience. OP2 was located in Lethbridge, in southern Alberta in close  
189 proximity to many commercial beekeepers, and where honey bee colonies are frequently used for  
190 canola pollination. OP2 collaborated with two commercial beekeepers with large operations but  
191 virtually no queen breeding experience. OP2 was led by a researcher with many years of  
192 beekeeping experience, including experience with queen rearing and selective breeding. While  
193 OP2 had diverse queen production experience, the beekeepers leading OP2 had collectively less  
194 experience than OP3 in large scale queen production. OP3 was located in Beaverlodge, Alberta  
195 on the campus of Beaverlodge Research Farm (BRF), Agriculture and Agri-Food Canada, a  
196 federal government research facility. The BRF is located in the Peace Region, the center of  
197 Alberta's prolific honey producing region where honey per colony is typically well above the  
198 nation's average of 55 kgs. (Emunu 2017, Page and Darrach 2016). OP3 was a moderately-sized  
199 operation led by an experienced queen breeder.

200

201 Table 1 lists relevant attributes of the three breeding operations including size, cell and queen  
202 numbers, as well as grafting and mating success rates. Grafting success is calculated by the  
203 number of successful queen cells in which larvae were successfully reared compared with the  
204 number of cups into which larvae were grafted. Mating success refers to the number of emerged

205 virgin queens that are mated (as determined by the queen producer who observes egg laying in  
206 the mating colony) compared with the number of virgin queen cells that were introduced into  
207 mating colonies or nuclei. Grafting success can be a function of breeder experience,  
208 environmental factors and/or resources devoted to the operation. Mating success is a function of  
209 emergence rates, weather, and drone sources among other environmental conditions (eg.  
210 predation) as well as inherent genetic qualities. Through the springs and summers of 2018 and  
211 2019, the three breeding operations tracked all inputs into both queen cell and mated queen  
212 production including bee feed, materials, and labour. Due to the sequential and additive nature of  
213 queen cell into mated queen production, inputs into grafting and rearing cells are also included as  
214 inputs into mated queens. Thus, mated queen costs are a function of queen cell costs, in addition  
215 to costs specific to rearing and mating queens post cell stage. For the purposes of this queen  
216 production study, the costs associated with breeder selection are not included in the production  
217 costs. Selection and production are two distinct processes and our focus in this paper is to  
218 examine the latter. As well, the opportunity costs incurred by beekeepers who invest their labour  
219 and beekeeping resources into queen production at the expense of other beekeeping output is not  
220 included in these calculations.

221  
222 For this analysis, we are considering only existing beekeepers as viable players to enter the  
223 queen production industry due to the high level of skill and beekeeping experience required for  
224 queen production, and thus we assume that these beekeepers will use their current operation's  
225 beekeeping equipment such as land, colonies, and bees to conduct their queen rearing. Additional  
226 resources used only for cell and queen production including queen rearing materials and feed  
227 will be included in the cost analysis for 2018, whereas only additional materials (cell cups, queen

228 cages, feed) that are typically not re-used will be included for year 2. Tables 2a. and 2b. show the  
 229 inputs and costs associated with cell and queen rearing respectively for all three operations in  
 230 both years. Table 3 lists pricing and describes the labour activities associated with the labour  
 231 activity numbers given in tables 2a and 2b. All labour wages are paid at an average of  
 232 CDN\$20/hour to account for both higher skilled labour, less skilled labour and unpaid family  
 233 labour (Laate 2017).

234

235 **Table 1.** Breeding cost case study operation demographics

|            | Location        | Years of intensive breeding experience | Forage                     | Surroundings                    | # Queen cells/# cups grafted (2018, 2019) | Grafting Success Rate (2018, 2019) | # Queens successfully mated/# queen cells (2018, 2019) | Mating Success Rate (2018, 2019) |
|------------|-----------------|----------------------------------------|----------------------------|---------------------------------|-------------------------------------------|------------------------------------|--------------------------------------------------------|----------------------------------|
| <b>OP1</b> | Moncton, NB     | 3 yrs.                                 | Bramble, goldenrod, clover | Somewhat isolated               | 359/450, 202/270                          | 80%, 75% <sup>1</sup>              | 40/60, 80/116                                          | 67%, 69%                         |
| <b>OP2</b> | Lethbridge, AB  | 10 yrs.                                | Canola, sweet clover       | City, other bee yards, ag areas | 36/90, 675/945                            | 40%, 71%                           | 30/36, 356/430                                         | 83%, 83%                         |
| <b>OP3</b> | Beaverlodge, AB | 15 yrs.                                | Canola, alfalfa            | Isolated from other yards       | 125/140, 50/58                            | 90%, 86%                           | 119/125, 50/50                                         | 95%, 100%                        |

<sup>1</sup>OP1 conducted their 2019 queen production over two subsequent rounds that are merged together for this costing analysis, however, it is important to note that the grafting success increased from 59% in round 1 to 91% in round 2, indicating potential for rapid skill acquisition for newer queen producers. Potential reasons for low grafting success for OP1 in Round 1 (as self-reported) were identified as: 1) presence of a laying worker in cell builder #2; 2) presence of queen cells in the upper box of cell builders 3) poor grafting technique and 4) weak cell builders.

236 **Table 2a.** Queen cell breeding costs for three operations

|                                             | <b>OP1 2018</b> | <b>OP1 2019</b> | <b>OP2 2018</b> | <b>OP2 2019</b>     | <b>OP3 2018</b> | <b>OP3 2019</b> |
|---------------------------------------------|-----------------|-----------------|-----------------|---------------------|-----------------|-----------------|
| # cell builders used                        | 4               | 6               | 3               | 15                  | 3               | 2               |
| # queen cells/# cups grafted                | 359/450         | 202/270         | 36/90           | 675/945             | 125/140         | 50/58           |
| <b>Feed for all cell builders</b>           |                 |                 |                 |                     |                 |                 |
| Pollen patties (#) <sup>2</sup>             | 20              | 6               | 6               | 15                  | 3               | 2               |
| Sugar syrup <sup>3</sup> (L)                | 60              | 45              | 11              | 28                  | 0               | 0               |
| <b>Total feed cost<sup>4</sup> (\$)</b>     | <b>\$107.76</b> | <b>\$55.44</b>  | <b>\$26.55</b>  | <b>\$66.38</b>      | <b>\$8.46</b>   | <b>\$5.64</b>   |
| <i>Feed cost per cell cup (\$/cup)</i>      | <i>\$0.24</i>   | <i>\$0.21</i>   | <i>\$0.30</i>   | <i>\$0.07</i>       | <i>\$0.06</i>   | <i>\$0.1</i>    |
| <b>Materials</b>                            |                 |                 |                 |                     |                 |                 |
| Cell cups (#)                               | 450             | 270             | 90              | 945                 | 140             | 58              |
| Grafting frames (w/bars) (#)                | 10              | Re-using        | 3               | 9                   | 4               | Re-using        |
| Grafting tool (#)                           | 1               | Re-using        | 1               | 2                   | 1               | Re-using        |
| <b>Total materials cost (\$)</b>            | <b>\$225.45</b> | <b>\$54.00</b>  | <b>\$62.80</b>  | <b>\$317.45</b>     | <b>\$85.75</b>  | <b>\$11.60</b>  |
| <i>Materials cost per cell cup (\$/cup)</i> | <i>\$0.50</i>   | <i>\$0.20</i>   | <i>\$0.70</i>   | <i>\$0.34</i>       | <i>\$0.61</i>   | <i>\$0.20</i>   |
| <b>Labour cost (\$)<sup>5</sup></b>         |                 |                 |                 |                     |                 |                 |
| Number of hours (h)(activity)               | 24(1), 8(2)     | 8(1), 4.5(2),   | 2(1),1.5(2),    | 11.41(1), 15.33(2), | 7(1), 3(2),     | 7(1), 3(2)      |
| Labour (1,2,3) see Table 3                  |                 | 1(3)            | 0.5(3)          | 1.5(3)              | 1(3)            |                 |
| Total duration (h)                          | 32              | 15.5            | 4               | 28.24               | 11              | 10 h            |
| Min/cup                                     | 4.27            | 3.44            | 2.67            | 1.79                | 4.71            | 10.34           |
| <b>Total labour cost (\$)</b>               | <b>\$640.00</b> | <b>\$270.00</b> | <b>\$80.00</b>  | <b>\$564.80</b>     | <b>\$220.00</b> | <b>\$200.00</b> |
| <i>Labour cost per cell cup (\$/cup)</i>    | <i>\$1.42</i>   | <i>\$1.00</i>   | <i>\$0.89</i>   | <i>\$0.60</i>       | <i>\$1.57</i>   | <i>\$3.45</i>   |
| <b>Total cost (TC) (\$)</b>                 | <b>\$973.21</b> | <b>\$379.44</b> | <b>\$169.35</b> | <b>\$948.63</b>     | <b>\$314.21</b> | <b>\$217.24</b> |
| <i>TC per cell cup (\$/cup)</i>             | <i>\$2.16</i>   | <i>\$1.41</i>   | <i>\$1.88</i>   | <i>\$1.00</i>       | <i>\$2.24</i>   | <i>\$3.75</i>   |
| <i>TC per Queen cell (\$/cell)</i>          | <i>\$2.7108</i> | <i>\$1.8784</i> | <i>\$4.7042</i> | <i>\$1.40537</i>    | <i>\$2.5137</i> | <i>\$4.3448</i> |

237

<sup>2</sup> Pollen patties consist of some or all of the following: vitamins, lemon juice, yeast, pollen, sugar, dried egg, honey, and oil.

<sup>3</sup> Sugar syrup consists of some proportion of sugar to water depending on the desired outcome (1:1 or 2:1).

<sup>4</sup> The costs per cup for feed, materials and labour are calculated using the total number of grafted cups, not the total number of cells that grafted successfully. The total cost per successfully grafted cell is shown below.

<sup>5</sup> Labour is costed here at CDNS\$20/h.

238 **Table 2b.** Mated queen breeding costs for three operations

|                                                                                        | <b>OP1 2018</b>                           | <b>OP1 2019</b>                           | <b>OP2 2018</b>                           | <b>OP2 2019</b>                           | <b>OP3 2018</b>                          | <b>OP3 2019</b>                          |
|----------------------------------------------------------------------------------------|-------------------------------------------|-------------------------------------------|-------------------------------------------|-------------------------------------------|------------------------------------------|------------------------------------------|
| # Total queen cells used                                                               | 60                                        | 116                                       | 36                                        | 430                                       | 125                                      | 50                                       |
| # Successfully mated queens                                                            | 40                                        | 80                                        | 30                                        | 356 <sup>6</sup>                          | 119                                      | 50                                       |
| <b>Total cost for queen cells<sup>7</sup></b><br>(# queen cells used)                  | \$162.6535<br>(60)                        | \$217.8962<br>(116)                       | \$169.3500<br>(36)                        | \$604.3092<br>(430)                       | \$314.2125<br>(125)                      | \$217.2400<br>(50)                       |
| <b>Feed</b>                                                                            |                                           |                                           |                                           |                                           |                                          |                                          |
| Sugar syrup (L)                                                                        | 227                                       | 439                                       | Honey Flow*                               | Honey Flow*                               | Honey Flow*                              | Honey Flow*                              |
| <b>Total feed cost (\$)</b>                                                            | <b>\$192.60</b>                           | <b>\$372.36</b>                           | <b>\$0.00</b>                             | <b>\$0.00</b>                             | <b>\$0.00</b>                            | <b>\$0.00</b>                            |
| Feed cost per cell (\$/cell)                                                           | \$3.21                                    | \$3.21                                    | \$0.00                                    | \$0.00                                    | \$0.00                                   | \$0.00                                   |
| <b>Materials</b>                                                                       |                                           |                                           |                                           |                                           |                                          |                                          |
| Queen cage (#)                                                                         | 40                                        | 80                                        | 30                                        | 356                                       | 119                                      | 50                                       |
| Queen candy (#)                                                                        | 40                                        | 80                                        | 30                                        | 356                                       | 119                                      | 50                                       |
| Marking pen (#)                                                                        | 1                                         | 1                                         | 1                                         | 2                                         | 1                                        | 1                                        |
| <b>Total materials cost<sup>8</sup> (\$)</b>                                           | <b>\$27.15</b>                            | <b>\$45.35</b>                            | <b>\$22.60</b>                            | <b>\$179.88</b>                           | <b>\$63.01</b>                           | <b>\$31.70</b>                           |
| Materials cost per cell (\$/cell)                                                      | \$0.68                                    | \$0.57                                    | \$0.75                                    | \$0.51                                    | \$0.53                                   | \$0.63                                   |
| <b>Labour</b>                                                                          |                                           |                                           |                                           |                                           |                                          |                                          |
| Number of hours (h)(activity)                                                          | 18(4), 8(5), 10(6)                        | 14(4), 15(5&6)                            | 19.25(4), 2(5), 2.5(6)                    | 109.1(4),<br>51.1(5), 31(6)               | 20(4), 4(5),<br>21.5(6)                  | 11(4), 1.5(5), 3(6)                      |
| Labour (4,5,6) see Table 3                                                             |                                           |                                           |                                           |                                           |                                          |                                          |
| <b>Labour cost (\$)</b>                                                                | <b>\$720.00</b>                           | <b>\$580.00</b>                           | <b>\$475.00</b>                           | <b>\$3830.00</b>                          | <b>\$910.00</b>                          | <b>\$310.00</b>                          |
| Total number of hours (h)                                                              | 36                                        | 29                                        | 23.75                                     | 191.2                                     | 45.5                                     | 15.5                                     |
| Min/cell                                                                               | 36.00                                     | 15.00                                     | 39.58                                     | 26.68                                     | 21.84                                    | 18.6                                     |
| Labour cost per cell (\$/cell)                                                         | \$12.00                                   | \$5.00                                    | \$13.19                                   | \$8.91                                    | \$7.28                                   | \$6.20                                   |
| <b>Total cost for Q rearing (\$)</b><br><b>(including cell costs)</b>                  | <b>\$1102.40</b>                          | <b>\$1215.61</b>                          | <b>\$666.95</b>                           | <b>\$4614.19</b>                          | <b>\$1287.31</b>                         | <b>\$558.94</b>                          |
| <b>Total cost per successfully mated Queen (\$/Q)</b>                                  | <b>\$27.56</b>                            | <b>\$15.20</b>                            | <b>\$22.23</b>                            | <b>\$12.96</b>                            | <b>\$10.82</b>                           | <b>\$11.18</b>                           |
| <b>Total additional cost per successfully mated queen (\$/Q) (subtract cell costs)</b> | <b>(\$27.56-\$2.71)</b><br><b>\$24.85</b> | <b>(\$15.20-\$1.88)</b><br><b>\$13.32</b> | <b>(\$22.32-\$4.70)</b><br><b>\$17.62</b> | <b>(\$12.96-\$1.41)</b><br><b>\$11.55</b> | <b>(\$10.82-\$2.51)</b><br><b>\$8.33</b> | <b>(\$11.18-\$4.34)</b><br><b>\$6.84</b> |

239

240

241

242 **Table 3.** Materials and labour pricing and description

| <b>Materials (ea.)</b>     | <b>Unit Price (ea.)</b> | <b>Labour</b>        | <b>Activities</b>                                               |
|----------------------------|-------------------------|----------------------|-----------------------------------------------------------------|
| Sugar syrup (L)            | \$0.85                  | <i>Cells:</i>        |                                                                 |
| Pollen patty               | \$2.82                  | 1                    | Preparing cells & transporting colonies                         |
| Cell cup                   | \$0.20                  | 2                    | Grafting cells                                                  |
| Grafting frame (with bars) | \$12.95                 | 3                    | Checking cells                                                  |
| Grafting tool              | \$5.95                  |                      |                                                                 |
| Queen cage                 | \$0.45                  | <i>Mated Queens:</i> |                                                                 |
| Queen candy                | \$0.005                 | 4                    | Preparing and transporting colonies and preparing mating yard   |
| Marking pen                | \$8.95                  | 5                    | Installing cells and marking queens <sup>9</sup>                |
|                            |                         | 6                    | Checking colonies for laying pattern, staff breaks and clean up |

243

244

245

246

<sup>6</sup> In some queen production operations beekeepers will perform another round of cell introductions to compensate for any poor laying in their mating colonies, this would increase the mating success rate and reduce per queen costs.

<sup>7</sup> To calculate the per cell cost the cost that was incurred to produce each successful cell was used (ranging in Table 1 from \$1.41-\$4.70).

<sup>8</sup> In non-research based operations the queen producer may not use marking pens. In the case of a queen producer using their queens within the operation and thus not for sale, queen cages and candy may not be necessary.

<sup>9</sup> In non-research-based operations, there may not be any labour attributed to queen marking.

247 Results

248

249 We observed a relative consistency of cell and queen material costs across operations and across  
250 time which highlights a systematic cell and queen production process for beekeepers rearing  
251 queens and suggests that we may be able to extrapolate these results to a wider queen production  
252 sector. The amount of feed per cell builder was up to the discretion of the queen producer and  
253 varied greatly between operations. Feed for the mating colonies varied as well but was more a  
254 function of environmental factors such as forage availability. OP1 fed the mating nucleus  
255 colonies sugar syrup as there was not a sufficient honey flow to provide sustenance for the  
256 colonies, unlike OP2 and OP3 who both had strong honey flows at the time of queen rearing and  
257 mating. Material costs per cell and per queen were fairly consistent across the three operations in  
258 both years. The same materials were used in all three operations and only small differences arose  
259 due to the number of grafting frames used with fixed numbers of bars and space for cups.  
260 Depending on the number of cups that the researcher chose to graft, some of the equipment was  
261 not utilized to full capacity (each frame has three bars and each bar has space for 15 cups) and  
262 thus affected the per cup cost. Each operation also had to spread the cost of the grafting tools and  
263 pens over the specific number of cells or queens, resulting again in some cost variability. The  
264 operations were able to re-use production equipment such as frames, tools and pens, reducing the  
265 costs in 2019. Overall, there were minimal cost differentials among operations in per cell/queen  
266 materials, however we observed larger differences in per unit feed and labour costs and the three  
267 operations also experienced varying grafting and mating success rates.  
268 Labour costs varied tremendously between operations for both cells and mated queen and were a  
269 function of breeder experience, management objectives (research-focused operations spent more

270 time with the bees observing specific traits and behaviour for both selection and educational  
 271 purposes) and the amount of time the breeder was able to allocate to cell and queen rearing that  
 272 season. As well, there is an economy of scale that develops as the number of queens produced  
 273 increases while other costs remain static such as travel time to apiaries and some of the general  
 274 labour involved. These inputs (and associated costs) are incurred regardless of the number of  
 275 queens, thus as the number of queens produced rises, the per cell or per queen costs decrease. In  
 276 2018, OP3 had slightly higher per cell labour costs than OP1, however OP2 had much lower  
 277 labour costs, a result of the researcher/producer not having much time to allocate to that  
 278 component of the study. For mated queens in 2018, OP2 had the highest per unit labour costs  
 279 followed closely by OP1, whereas OP3 had much lower costs, likely a function of streamlining  
 280 tasks with highly experienced and skilled labour. In 2018, the three breeding operations had a  
 281 range of overall costs for producing queen cells from \$2.51/cell to \$4.70/cell and \$8.31 to \$24.85  
 282 for producing a mated queen (Table 4). Total per cell costs for rearing a successful queen cell in  
 283 2018 were similar between OP1 and OP3, however, OP2's overall costs per cell were nearly  
 284 twice as high as the other two operations, a result of poor grafting success rates which meant  
 285 higher per cell costs.

286

287 **Table 4.** Per cell and per mated queen production costs over three operations during the spring/summer 2018.

|                         | Queen Cells   |               |               |                                    | Mated Queens     |                  |                  |
|-------------------------|---------------|---------------|---------------|------------------------------------|------------------|------------------|------------------|
|                         | OP1           | OP2           | OP3           |                                    | OP1              | OP2              | OP3              |
| Feed Cost (\$/cup)      | \$0.24        | \$0.30        | \$0.06        | Feed Cost (\$/Q)                   | \$3.21           | \$0.00           | \$0.00           |
| Materials Cost (\$/cup) | \$0.50        | \$0.70        | \$0.61        | Materials Cost (\$/Q)              | \$0.68           | \$0.75           | \$0.53           |
| Labour Cost (\$/cup)    | \$1.42        | \$0.89        | \$1.57        | Labour Cost (\$/Q)                 | \$12.00          | \$13.19          | \$7.28           |
| Total cost (\$/Q cell)  | <b>\$2.71</b> | <b>\$4.70</b> | <b>\$2.51</b> | Total Additional Cost (\$/mated Q) | <b>\$24.85</b>   | <b>\$17.53</b>   | <b>\$8.31</b>    |
|                         |               |               |               | ( <i>minus cell costs</i> )        | <i>(\$27.56-</i> | <i>(\$22.23-</i> | <i>(\$10.82-</i> |
|                         |               |               |               |                                    | <i>\$2.71)</i>   | <i>\$4.70)</i>   | <i>\$2.51)</i>   |

288

289

290 In 2019, the three breeding operations had a range of overall costs for producing queen cells  
291 from \$1.18/cell to \$4.34/cell and \$6.84/mated queen to \$13.32/mated queen in addition to the  
292 queen cell costs (Table 5). OP1 and OP3 reduced the number of cells and queens reared whereas  
293 OP2 increased their production of cells and queens between years. The input costs for feed  
294 within the operations remained fairly consistent between years which is expected given the  
295 management paradigms and availability of forage. However, for OP1 and OP2 there were  
296 reductions in materials and labour costs within operations from year to year suggesting both  
297 significant efficiency from materials re-use as well as a skill and knowledge acquisition leading  
298 to increased labour efficiencies. OP3 experienced an uncharacteristically wet and cold summer  
299 with significantly more rain and colder temperatures in 2019 compared to both 2018 and 2017  
300 (GCMCS 2019) making queen rearing more difficult and more than doubling the cost of labour  
301 required per grafted cup. As a result, the overall cost to rear queen cells for OP3 nearly doubled  
302 from 2018 to 2019. The researcher/beekeeper managing OP3 has extensive queen rearing  
303 expertise and thus it would be less likely for OP3 to experience significant skill acquisition and  
304 labour cost savings year to year, as labour efficiencies are likely already optimized. Furthermore,  
305 given the extreme environmental conditions in 2019 for OP3, the increase in labour costs were  
306 not unexpected and in spite of the poor conditions for queen rearing, the experienced beekeeper  
307 managed to attain high levels of grafting success.

308  
309  
310  
311  
312  
313  
314



315 **Table 5.** Per cell and per queen rearing costs over two operations during the spring/summer 2019.

|                                        | Queen Cells   |               |               |                                                              | Mated Queens                              |                                           |                                        |
|----------------------------------------|---------------|---------------|---------------|--------------------------------------------------------------|-------------------------------------------|-------------------------------------------|----------------------------------------|
|                                        | OP1           | OP2           | OP3           |                                                              | OP1                                       | OP2                                       | OP3                                    |
| <b>Feed Cost (\$/cup)</b>              | \$0.21        | \$0.07        | \$0.10        | <b>Feed Cost (\$/Q)</b>                                      | \$3.21                                    | \$0                                       | \$0                                    |
| <b>Materials Cost (\$/cup)</b>         | \$0.20        | \$0.34        | \$0.20        | <b>Materials Cost (\$/Q)</b>                                 | \$0.57                                    | \$0.51                                    | \$0.63                                 |
| <b>Labour Cost (\$/cup)</b>            | \$1.00        | \$0.60        | \$3.45        | <b>Labour Cost (\$/Q)</b>                                    | \$5.00                                    | \$8.91                                    | \$6.20                                 |
| <b>Total cost (\$/successful cell)</b> | <b>\$1.88</b> | <b>\$1.41</b> | <b>\$4.34</b> | <b>Total Additional Cost (\$/mated Q) (minus cell costs)</b> | <b>\$13.32</b><br><i>(\$15.20-\$1.88)</i> | <b>\$11.55</b><br><i>(\$12.96-\$1.41)</i> | <b>\$6.84</b><br><i>(\$11.18-4.34)</i> |

316

317 Figures 4 and 5 show the overall costs per cells and mated queens as well as the %  
 318 reduction/increase in costs within an operation between years. Overall cell production costs  
 319 between two years for OP1 fell from \$2.71 per cell to \$1.88 per cell, while OP2 saw a reduction  
 320 in cell costs from \$4.70 down to \$1.40 over the same two years. As mentioned earlier, OP3 had  
 321 higher per cell costs in 2019 due to poor weather, however, additional mated queen costs for  
 322 2019 for OP3 remained the lowest of the three operations and was even lower than their own  
 323 additional queen costs in 2018. There were cost reductions for mated queen production between  
 324 years for all three operations (Fig 5).

### Cell Rearing Costs: 2018 & 2019

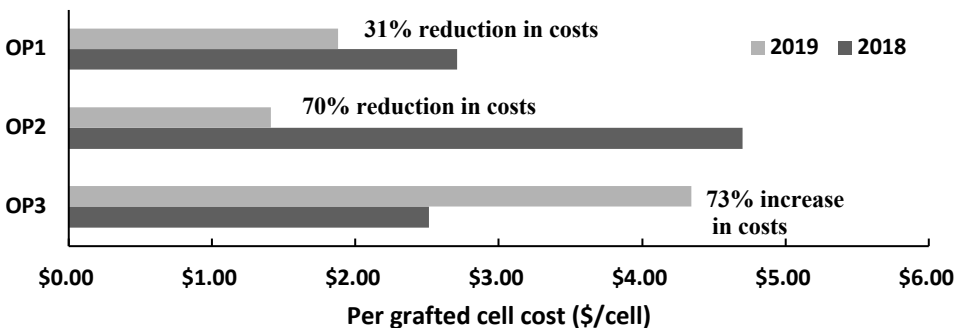

325

326 **Figure 4.** Per queen cell cost differential between first two production years.

## Queen Rearing costs: 2018 & 2019

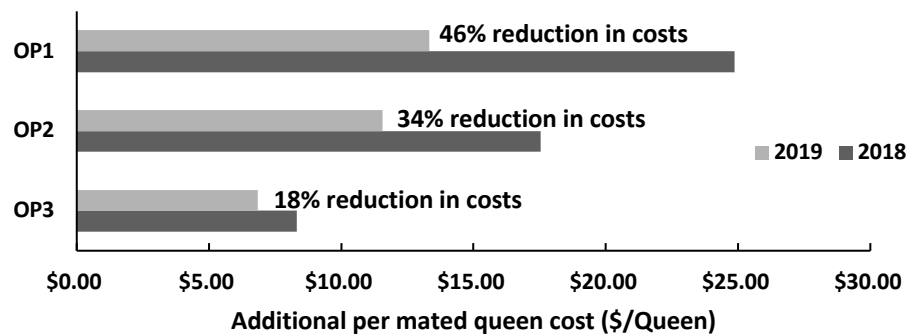

327

328 **Figure 5.** Per mated queen cost differential between first two production years.

329

330 As the queen industry in Canada continues to develop and queen producers gain experience and

331 are able to bring costs down, we are seeing alternative queen rearing practices introduced into

332 operations to improve queen and colony health and reduce costs. Some queen producers in

333 Alberta and across the country have begun to introduce queen cells into queenright colonies

334 (colonies with an existing often older and/or less productive queen). This strategy allows the

335 colony to requeen itself as an alternative to producing or purchasing a mated queen, with the

336 same goal of ultimately building-up a stronger, healthier colony led by a young, healthy queen.

337 Mixed success with requeening was reported in earlier research studying the success of

338 introducing queen cells in queenright colonies (Szabo 1982, Jay 1981). However, there is a

339 known positive impact from requeening in terms of decreased winter mortality and increased

340 colony strength particularly when requeening with younger queens (Woyke 1984, Ricigliano et

341 al. 2018), further reducing colony management and replacement costs. It is important that the

342 queen production industry exercise caution, however, in proceeding with this requeening strategy

343 as there is no data to support conclusive positive outcomes (Szabo 1982). The timing for

344 requeening is also of critical importance as there would be a gap in the brood cycle of these  
345 colonies. This could negatively impact colony size at critical time points such as pollination  
346 contracts, honey flows, or population build up going into winter, unless the requeening method  
347 prevents the interruption of egg laying in the colony (Forster, 1972). More research is needed on  
348 the biological feasibility and economic efficiency of using cells to requeen queenright colonies.

349  
350 Introducing queen cells (whether into queenless or queenright colonies) would mean that in the  
351 case of our three case study queen producers, an investment of between \$2 and \$5 per queen cell  
352 would potentially yield a strong colony with desirable genetics, saving the queen producer  
353 between 77% (OP3) and 90% (OP1) in queen production costs beyond the cell stage (see total  
354 additional cost, table 5). In the case of a beekeeper purchasing cells to re-queen colonies, the  
355 savings would also be significant as import queen prices continue to rise (Page 2017). In a  
356 theoretical example, a commercial beekeeper with costs similar to OP1, investing \$2.50 per  
357 successful queen cell with a 5000-colony apiary would be able to re-queen half of his colonies  
358 for a total cost of \$12,500 compared to spending \$54,050 (an additional \$41,550 beyond the cell  
359 stage) to produce 5000 mated queens or purchasing 5000 queens for a minimum of \$200,000  
360 (\$40 per queen). Alternatively, rather than using their cells or queen in their own operations,  
361 queen producers can sell their queen cells and/or mated queens to other beekeepers. In cases of  
362 higher overall per cell costs such as in OP2 for 2018, rearing and selling queen cells is less  
363 profitable than for OP1 and OP3 due to lower costs, however, for all three operations there are  
364 significant profits from selling queen cells in 2018 and 2019. The price for selling queen cells in  
365 Canada ranges from \$8 to \$15 and in some cases even higher (AR 2019, ZQ 2019) resulting in a  
366 range of profitability for the three operations at difference price points in 2018. In 2019, due to a

367 decrease in costs (Figs. 4 & 5), we see increases in profitability for both OP1 and OP2 from  
368 selling queen cells (Figure 6) and a decrease in profitability for OP3.

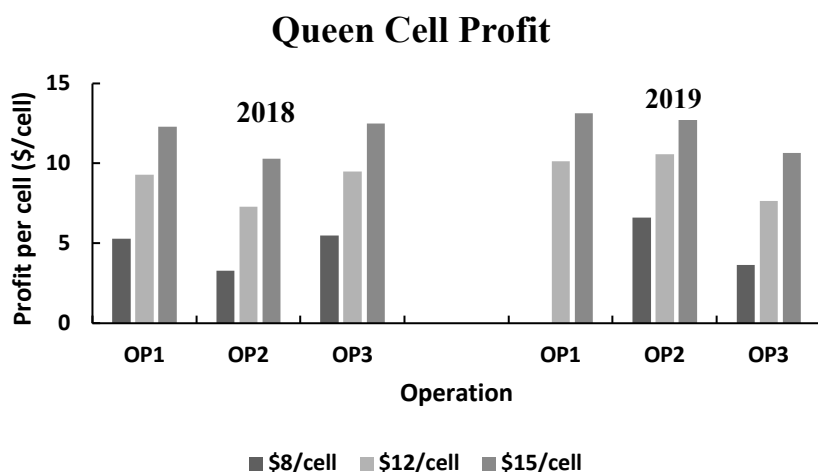

369

370 **Figure 6.** Per cell profit by cell prices and operation costs for 2018 and 2019.

371

372 Queen cells require fewer resources and can be produced in larger quantities than mated queens.

373 However, queen cells present a higher risk to the buyer as the queen has not yet emerged or

374 successfully mated, and they are extremely sensitive to transport. Their use increases the risk of

375 queen failure and may require a period of queenlessness for a colony while mating takes place

376 resulting in lost production. As a result of these challenges, demand for queen cells in Canada is

377 much less than the demand for mated queens. Given the recent trend of rising queen prices (Page

378 2017), the increased demand for local queens, and the willingness of Canadian beekeepers to pay

379 a premium for locally bred queens, domestic queen prices are now in the range of \$30-\$50/queen

380 (Bixby et al. 2019). These higher prices and the range of mated queen costs for 2018 from

381 \$10.84/queen to \$27.79/queen, means that all three operations would reap a range of positive

382 profits from just over \$2 at \$30/queen to over \$20 at \$50/queen for the high cost operation of

383 OP1. On the lower end of costs, OP3 would reap a profit of \$19 for selling a queen at \$30 and

384 nearly \$40/queen if sold for \$50 each. In 2019 we see increases in profit for mated queens for  
385 OP1 and OP2. At a price of \$40/queen, OP1 sees a 100% increase in profits from 2018 to 2019,  
386 OP2 sees a 60% increase in profits while OP3 experiences a small loss of less than \$0.40  
387 between the two years (Figure 7). It is important to consider that although these costs take into  
388 account queen cages, candy and beekeeper labour, they do not include shipping costs as these  
389 can be paid by the receiver or the shipper depending on the contractual agreement.

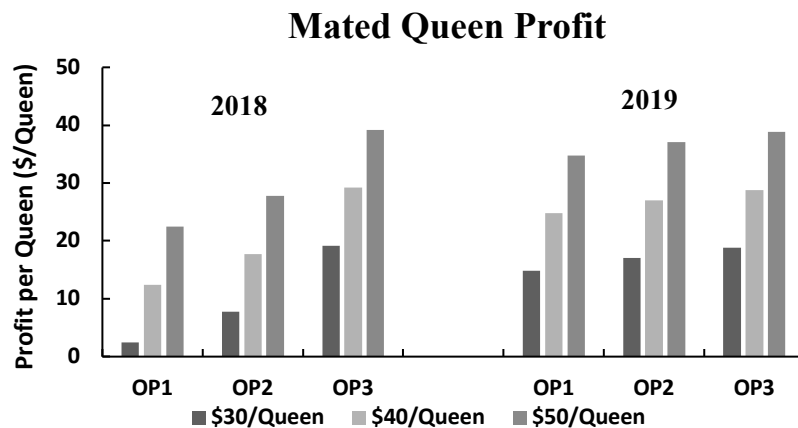

390  
391 **Figure 7.** Mated queen profit for three breeding operations given a range of queen prices for 2018 and 2019. Queen  
392 costs used for profitability calculations are the full cost of rearing a mated queen including the costs of producing the  
393 cells.

394  
395 For each round of queen production, final per cell and queen costs are highly dependent on both  
396 grafting and mating success rates, which varied between operations and over time (Table 1).  
397 Figure 8 shows the profitability for mated queens in OP3 in the first, more meteorologically  
398 representative year of 2018 given a range of grafting success rates and queen prices, assuming a  
399 level of mating success consistent with OP3's 2018 production year (95%). As grafting success  
400 increases with breeder experience and optimal management and environmental conditions (AV  
401 2017, Emsen et. al. 2003), profitability increases although because the impact of grafting success

402 on mated queen costs is relatively small, the increase in profits is also small. For an increase in  
403 grafting success from 50% to 75% we see a less than 6% increase in profits and for a jump in  
404 grafting success from 75% to 100%, we see an increase of less than 3% in mated queen profits.  
405 Mating success has a more significant effect on per mated queen profits. Figure 9 shows the  
406 impact that the queen's mating success has on profitability of mated queens for OP3, given an  
407 average grafting success rate for OP3 of 85% and variable mating success rates that are  
408 consistent with our three case studies experiences. A rise in mating success from 60% to 80%  
409 results in a 19% profitability increase while an increase from 80% to 100% in mating success  
410 results in a 10% rise in profits per mated queen. Our researcher-led case studies had variable  
411 mating success rates in 2018, ranging from 67% for OP1 up to 95% for OP3 (Table 1), the  
412 disparity likely a function of environmental factors. Typical mating success reported in the  
413 literature and anecdotally varies between 60-95%. Commercial queen operations typically have  
414 high mating success rates as a result of extensive queen rearing experience, skilled labour, and  
415 established mating apiaries with proven high success rates.

416

417

418

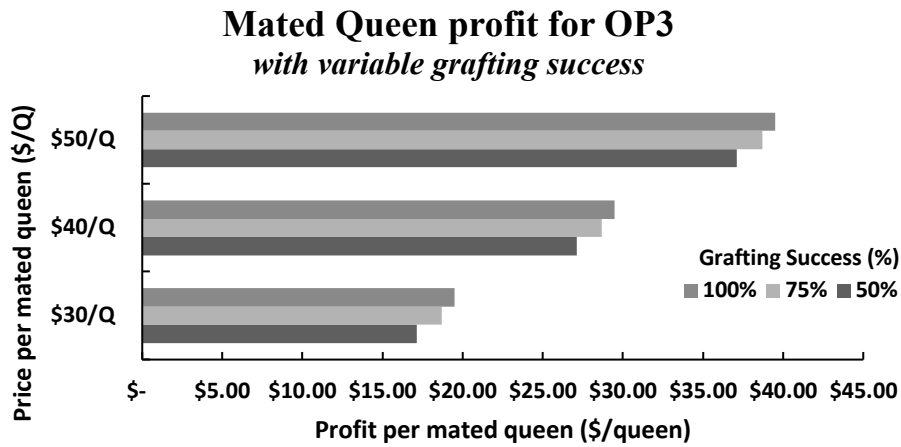

419

420 **Figure 8.** Mated queen profitability given lower production costs of OP3 in 2018, a 95% mating success rate with  
421 theoretical grafting success and queen prices.

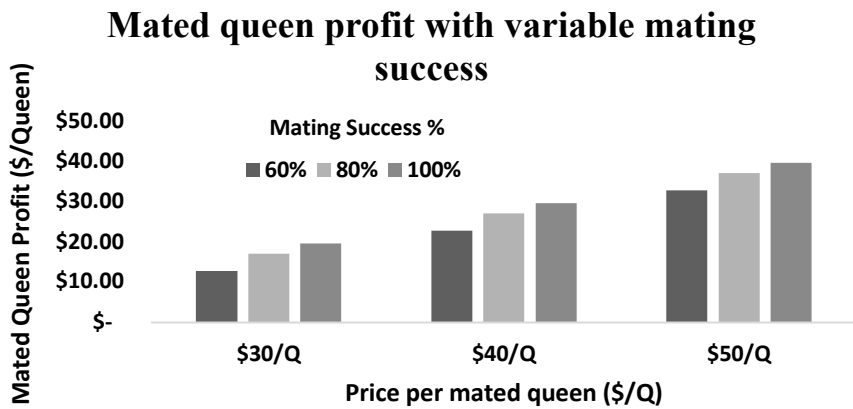

422

423 **Figure 9.** Mated queen profitability given lower production costs of OP3 in 2018, an 85% mating success rate with  
424 variable mating success rates and queen prices.

425

426

427

428

429 Discussion

430

431 This detailed economic breakdown of Canadian queen production provides evidence that queen  
432 production in Canada has the potential to be profitable even for new producers with variable  
433 grafting and mating success, as well as when skilled beekeepers are confronted with poor  
434 environmental conditions. Based on our study, the difference between total costs and total  
435 revenue in the mated queen market in Canada gives queen producers a reasonable profit by  
436 absorbing increased costs resulting from any number of factors including environmental  
437 conditions and other externalities. For Canadian beekeepers who rear their own cells and queens,  
438 there is great potential for cost savings by requeening their own colonies with queens/cells they  
439 produce. Whether the beekeeper uses queen cells or mated queens to requeen existing colonies,  
440 there will be significant cost savings by reducing queen purchase costs and simultaneously  
441 minimizing importation risks to ultimately reduce colony morbidity and mortality.

442

443 Each queen production operation in Canada will have a unique approach and expertise with  
444 queen rearing which will be reflected in its costs and profitability. However, for queen  
445 production, the steps taken and the resources used in each of our three case study operations  
446 were determined independently by the breeders without consultation and yet there were similar  
447 material costs. From 2018 to 2019, grafting success rates increased along with beekeeper  
448 experience. Material re-use and economies of scale for labour were also significant factors in  
449 cost reduction and profit increases for operations 1 and 2. Operation 3 had a more  
450 uncharacteristic progression from 2018 to 2019 as the climate variability in year 2 posed some  
451 significant management challenges and resulted in higher overall cell costs. However, while the



452 experienced queen producer in OP3 likely did not benefit from skill acquisition as such, he did  
453 have cost savings from re-using materials in 2019. OP3 was also able to use its queen rearing  
454 expertise to mitigate any significant profitability impact from the higher cell costs onto the more  
455 salient mated queen production costs. The similarities in material costs between operations  
456 reflect a common systematic approach to breeding in Canada, allowing us to extrapolate from  
457 our costing analysis to a broader representative Canadian small or medium-scale queen producer  
458 and conclude that queen production in Canada has the potential for profit and growth. The three  
459 operations' results in our study offer evidence that small to medium-scale queen production can  
460 be profitable. These results likely provide an upper bound for queen production costs, as large-  
461 scale commercial queen producers will reap the benefits of even greater economies of scale in  
462 their operations, lowering costs even further.

463  
464 As experienced beekeepers choose to enter the queen production industry, it is important to  
465 consider that first year expenditures are higher than in subsequent years. However, even a newly  
466 established queen production operation could be profitable given certain environmental and  
467 pricing conditions and a skilled beekeeper with some queen experience. Also, as new selective  
468 breeding technologies become available to the wider market, Canadian queen production will  
469 yield stronger, more highly selected queens that command higher prices. As queen rearing in  
470 Canada continues to proliferate and is shown to be profitable, methods will be streamlined  
471 further and the number of queen operations and availability of skilled labour should increase,  
472 enabling Canadian beekeepers to play a greater role in contributing to this industry's biological  
473 and financial autonomy and sustainability.

474

475

476 Acknowledgments

477 Thanks to the following individuals and beekeeping operations for contributing to the queen  
478 production in our three case studies: Chris Lockhart with Atlantic Gold/ Lockhart Apiaries and  
479 Jillian Shaw (OP1); Jeff Kearns, Rhonda Thygeson, Scandia Honey Co. Super Nuc Apiaries  
480 (OP2); Elena Battle, Michael Peirson, Chase Stevens, Jamie Clarke and Carly Balestra (OP3).

481

482 This work was part of the BeeOMICS project supported by funding from Genome Canada  
483 (227BEE), Genome British Columbia, Genome Alberta, Genome Prairie, Ontario Genomics,  
484 Genome Quebec and the Ontario Ministries of Research and Innovation and Agriculture.

485 **References Cited**

486

487 **Amiri, E., M.K. Strand, O. Rueppell, and D.R. Tarpy. 2017.** Queen Quality and the Impact of  
488 Honey Bee Diseases on Queen Health: Potential for Interactions between Two Major Threats to  
489 Colony Health. *Insects*, 8(2): 48. doi:10.3390/insects8020048, accessed 18 Nov. 2019.

490

491 **(AR 2019). Apis Rustica 2019.** (<http://www.apisrustica.com/rearing.html>, accessed 20 Nov.  
492 2019)

493

494 **(AV 2017). Agriculture Victoria 2017.** Raising Queen Honey Bees, 2017. Government of  
495 Australia, Victoria State Government. ([http://agriculture.vic.gov.au/agriculture/livestock/honey-](http://agriculture.vic.gov.au/agriculture/livestock/honey-bees/compliance-and-management/raising-queen-honey-bees)  
496 [bees/compliance-and-management/raising-queen-honey-bees](http://agriculture.vic.gov.au/agriculture/livestock/honey-bees/compliance-and-management/raising-queen-honey-bees), accessed 2<sup>nd</sup> December 2019)

497

498 **(BCBPS 2016). BC Beekeeping Production Statistics 2016.** BC Beekeeping Production  
499 Statistics 2016. British Columbia Ministry of Agriculture, 2016.

500

501 **(BIP 2019) Bee Informed Partnership 2019.** 2018/2019 Total Winter All Colony Loss.  
502 (<https://research.beeinformed.org/loss-map/>, accessed 9 Jan 2020)

503

504 **Bixby, M., M.M. Guarna, S.E. Hoover, and S.F., Pernal. 2019.** Canadian Honey Bee Queen  
505 Bee Breeder's Reference Guide. Canadian Association of Professional Apiculturists Publication,  
506 55 pp.

507

508 **(BOC 2019) Bank of Canada 2019.** Inflation Calculator.  
509 (<https://www.bankofcanada.ca/rates/related/inflation-calculator/>, accessed 6 Jan. 2020)  
510  
511 **(CAPA 2008) Canadian Association of Professional Apiculturists AGM Proceedings 2008.**  
512 Proceedings 2008, Calgary, Alberta.  
513 (<http://www.capabees.com/shared/2013/02/CAPAProceedings2008.pdf>, accessed 7 Jan 2020)  
514  
515 **(CAPA 2010) Canadian Association of Professional Apiculturists AGM Proceedings 2010.**  
516 Proceedings 2010/2011, Markham, Ontario.  
517 ([http://www.capabees.com/shared/2017/09/2010\\_11-CAPA-Proceedings-Markham-ON.pdf](http://www.capabees.com/shared/2017/09/2010_11-CAPA-Proceedings-Markham-ON.pdf),  
518 accessed 7 Jan, 2020)  
519  
520 **(CAPA 2019) Canadian Association of Professional Apiculturists wintering losses. 2019.**  
521 Annual Colony Loss Reports: CAPA Statement on Honey Bee Losses in Canada: (2007-2019).  
522 (<http://www.capabees.com/capa-statement-on-honey-bees/>, accessed 2<sup>nd</sup> December 2019)  
523  
524 **(CFIA 2013). Canadian Food Inspection Agency. 2013.** Risk Assessment on the Importation  
525 of Honey Bee (*Apis mellifera*) Packages from the United States of America (V13) September  
526 2013.  
527  
528 **Currie, R. W., F. Pernal, and N. E. Guzman. 2010.** Honey bee colony losses in Canada. *J.*  
529 *Apic. Res.* 49: 104–106.  
530

531 **Eccles, L., M. Kempers, R. M. Gonzalez, D. Thurston and D. Borges. 2017.** Canadian best  
532 management practices for honey bee health: Industry analysis and harmonization. Bee Health  
533 Round Table, Agriculture and Agri-Food, Canada.  
534 ([http://www.honeycouncil.ca/images2/pdfs/BMP\\_manual\\_-\\_Les\\_Eccles\\_Pub\\_22920\\_-](http://www.honeycouncil.ca/images2/pdfs/BMP_manual_-_Les_Eccles_Pub_22920_-_FINAL_-_low-res_web_-_English.pdf)  
535 [\\_FINAL\\_-\\_low-res\\_web\\_-\\_English.pdf](http://www.honeycouncil.ca/images2/pdfs/BMP_manual_-_Les_Eccles_Pub_22920_-_FINAL_-_low-res_web_-_English.pdf), accessed 7 Jan 2020)  
536  
537 **Emsen, B., A. Dodologlu, and F. Gene. 2003.** Effect of Larvae Age and Grafting Method on  
538 the Larvae Accepted Rate and Height of Sealed Queen Cell (*Apis mellifera* L.), J. Appl. Anim.  
539 24:2, 201-206, DOI: 10.1080/09712119.2003.9706457.  
540  
541 **Emunu, J. P. 2017.** Government of Alberta. Alberta 2017: Beekeeper Survey Results. Alberta  
542 Agriculture and Forestry. ([https://open.alberta.ca/dataset/a854e8c2-37cf-4c3e-a99f-](https://open.alberta.ca/dataset/a854e8c2-37cf-4c3e-a99f-3bc8e477ca8d/resource/66da7147-0a8c-45ab-8a39-770ce5fd6922/download/alberta-2017-beekeepers-survey-results-final.pdf)  
543 [3bc8e477ca8d/resource/66da7147-0a8c-45ab-8a39-770ce5fd6922/download/alberta-2017-](https://open.alberta.ca/dataset/a854e8c2-37cf-4c3e-a99f-3bc8e477ca8d/resource/66da7147-0a8c-45ab-8a39-770ce5fd6922/download/alberta-2017-beekeepers-survey-results-final.pdf)  
544 [beekeepers-survey-results-final.pdf](https://open.alberta.ca/dataset/a854e8c2-37cf-4c3e-a99f-3bc8e477ca8d/resource/66da7147-0a8c-45ab-8a39-770ce5fd6922/download/alberta-2017-beekeepers-survey-results-final.pdf), accessed 20 Nov. 2019)  
545  
546 **Forster, I.W. 1972.** Requeening honey bee colonies without dequeening. New. Zeal. J. Agr.  
547 Res. 15:2, 413-419, DOI: 10.1080/00288233.1972.10421270.  
548  
549  
550 **Furgala B. and D.M. McCutcheon. 1992.** Wintering productive colonies. In Graham J M (Ed).  
551 The hive and the honey bee (revised edition). Dadant and Sons; Hamilton, IL, USA: 829-868.  
552

553 **Gates, J., J. Howard, and A. Gunner. 1994.** Queen Rearing: Spring 1994. Province of British  
554 Columbia, Planning for Profit. Agdex 616-810.

555

556 **(GCMCS 2019) Government of Canada Monthly Climate Summaries 2019**

557 ([https://climate.weather.gc.ca/prods\\_servs/cdn\\_climate\\_summary\\_e.html](https://climate.weather.gc.ca/prods_servs/cdn_climate_summary_e.html), accessed 20 Nov.

558 2019)

559

560 **Genersch, E., W. von der Ohe, H. Kaatz, A. Schroeder, C. Otten, R. Büchler, S. Berg, W.**

561 **Ritter, W. Mühlen, and S. Gisder. 2010.** The German bee monitoring project: A long term

562 study to understand periodically high winter losses of honey bee colonies. *Apidologie* 41: 332–

563 352.

564

565 **Guarna M.M., S.E. Hoover, E. Huxter, H. Higo, K.M. Moon, D. Domanski, M. Bixby, A.P.**

566 **Melathopoulos, A. Ibrahim, M. Peirson, S. Desai, D. Micholson, R. White, C.H. Borchers,**

567 **R.W. Currie, S.F. Pernal and L.J. Foster. 2017.** Peptide biomarkers used for the selective

568 breeding of a complex polygenic trait in honey bees. *Sci. Rep.* 7(1): 8381.

569

570 **(HCSDA 2017) Horticulture and Cross Sectoral Division Agriculture and Agri-Food**

571 **Canada 2017.** Statistical Overview of the Canadian Honey and Bee Industry and the Economic

572 Contribution of Honey Bee Pollination 2016.

573 ([http://www.agr.gc.ca/resources/prod/doc/pdf/honey\\_2016-eng.pdf](http://www.agr.gc.ca/resources/prod/doc/pdf/honey_2016-eng.pdf), accessed 15<sup>th</sup> November

574 2019)

575

- 576 **Jay, S.C. 1981.** Requeening Queenright Honeybee Colonies with Queen Cells or Virgin Queens.  
577 J. Apic. Res. 20(2): 79-83.  
578
- 579 **Klein, A. M., E. Vaissiere, J. H. Cane, I. Steffan-Dewenter, S. A. Cunningham, C. Kremen,**  
580 **and T. Tscharntke. 2007.** Importance of pollinators in changing landscapes for world crops.  
581 Proc. R. Soc. Lond. B. 274: 303–313.  
582
- 583 **Laidlaw, H. and R. Page. 1997.** Queen rearing and bee breeding. Wicwas Press; 1st edition. 224  
584 pages.  
585
- 586 **Laate, E. A. 2017.** Economics of beekeeping in Alberta 2016. Economics Section,  
587 Economics and Competitiveness Branch, Alberta Agriculture and Forestry.  
588 ([https://www1.agric.gov.ab.ca/\\$Department/deptdocs.nsf/all/econ16542/\\$FILE/Beekeeping2016.](https://www1.agric.gov.ab.ca/$Department/deptdocs.nsf/all/econ16542/$FILE/Beekeeping2016.pdf)  
589 pdf, accessed 9 Jan, 2020)  
590
- 591 **Liu, Z., C. Chen, Q. Niu, W Qi, C. Yuan, S. Su, S. Liu, Y. Zhang, X. Zhang, and T. Ji.**  
592 **2016.** Survey results of honey bee (*Apis mellifera*) colony losses in China (2010–2013). J. Apic.  
593 Res. 55: 29–37.  
594
- 595 **Moore, Philip A., M. E. Wilson and J. A. Skinner. 2019.** Honey Bee Queens: Evaluating the  
596 most important colony member. US dept of Agriculture: Cooperative Extension Program.  
597 ([https://bee-health.extension.org/honey-bee-queens-evaluating-the-most-important-colony-](https://bee-health.extension.org/honey-bee-queens-evaluating-the-most-important-colony-member/)  
598 member/, accessed 18 Nov. 2019)

599

600 **Nelson, D. L., and C. Smirl. 1977.** The effect of queen-related problems and swarming on  
601 brood and honey production of honey bee colonies in Manitoba. *The Manitoba*  
602 *Entomologist* 11:45-49.

603

604 **Page, S. 2017.** Statistics Canada. Package and Queen Bee Imports by Source Country by  
605 Province, 2017. Canadian Agri-Trade Statistics system (CATSNET).

606

607 **Page, S., and M. Darrach. 2016.** Statistical overview of the Canadian Honey and Bee Industry  
608 and the economic contribution of honey bee pollination 2013–2014. Horticulture and Cross  
609 Sectoral Division Agriculture and Agri-Food Canada. ([http://www.agr.gc.ca/eng/industry-](http://www.agr.gc.ca/eng/industry-markets-and-trade/canadian-agri-food-sector-intelligence/horticulture/horticulture-sector-reports/statistical-overview-of-the-canadian-honey-and-bee-industry-and-the-economic-contribution-of-honey-bee-pollination-2016/?id=1510864970935)  
610 [markets-and-trade/canadian-agri-food-sector-intelligence/horticulture/horticulture-sector-](http://www.agr.gc.ca/eng/industry-markets-and-trade/canadian-agri-food-sector-intelligence/horticulture/horticulture-sector-reports/statistical-overview-of-the-canadian-honey-and-bee-industry-and-the-economic-contribution-of-honey-bee-pollination-2016/?id=1510864970935)  
611 [reports/statistical-overview-of-the-canadian-honey-and-bee-industry-and-the-economic-](http://www.agr.gc.ca/eng/industry-markets-and-trade/canadian-agri-food-sector-intelligence/horticulture/horticulture-sector-reports/statistical-overview-of-the-canadian-honey-and-bee-industry-and-the-economic-contribution-of-honey-bee-pollination-2016/?id=1510864970935)  
612 [contribution-of-honey-bee-pollination-2016/?id=1510864970935](http://www.agr.gc.ca/eng/industry-markets-and-trade/canadian-agri-food-sector-intelligence/horticulture/horticulture-sector-reports/statistical-overview-of-the-canadian-honey-and-bee-industry-and-the-economic-contribution-of-honey-bee-pollination-2016/?id=1510864970935), accessed 20 Nov. 2019)

613

614 **Pettis JS, N. Rice, K. Joselow, D. vanEngelsdorp, and V. Chaimanee 2016.** Colony Failure  
615 Linked to Low Sperm Viability in Honey Bee (*Apis mellifera*) Queens and an Exploration of  
616 Potential Causative Factors. *PLoS One*. 2016 Feb 10;11(2):e0147220. doi:  
617 10.1371/journal.pone.0147220. Erratum in: *PLoS One*.2016;11(5):e0155833.

618

619 **Phipps, R. 2017.** International Honey Market Update- June 2017. *American Bee Journal*.  
620 (<https://americanbeejournal.com/international-honey-market-2/>, accessed 7 Jan 2020)

621



- 622 **Potts, S. G., C. Biesmeijer, C. Kremen, P. Neumann, O. Schweiger, and W. E. Kumin. 2010.**  
623 Global pollinator declines: Trends, impacts and drivers. *Trends Ecol. Evol.* 25: 345–353.  
624
- 625 **(QIS 2018). Quebec Institute of Statistics 2018.** Main statistics for a few bee products, Quebec.  
626 ([http://www.stat.gouv.qc.ca/statistiques/agriculture/apiculture-](http://www.stat.gouv.qc.ca/statistiques/agriculture/apiculture-miel/statistiques_principales_produits_apicoles.html)  
627 [miel/statistiques\\_principales\\_produits\\_apicoles.html](http://www.stat.gouv.qc.ca/statistiques/agriculture/apiculture-miel/statistiques_principales_produits_apicoles.html), accessed 20 Nov. 2019)  
628
- 629 **Rangel, J., J.J. Keller, and D.R. Tarpy. 2013.** The effects of honey bee (*Apis mellifera* L.)  
630 queen reproductive potential on colony growth. *Insectes Sociaux.* 60(1): 65-73.  
631
- 632 **Ricigliano, V.A., B.M. Mott, A.S. Floyd, D.C. Copeland, M.J. Carroll and K.E. Anderson.**  
633 **2018.** Honey bees overwintering in a southern climate: longitudinal effects of nutrition and  
634 queen age on colony-level molecular physiology and performance. *Sci. Rep.* 8, 10475.  
635 doi:10.1038/s41598-018-28732-z.  
636
- 637 **Simeunovic, P., J. Stevanovic, D. Cirkovic, S. Radojicic, N. Lakic, L. Stanisic and Z.**  
638 **Stanimirovic. 2014.** *Nosema ceranae* and queen age influence the reproduction and productivity  
639 of the honey bee colony. *J. Apic. Res.* 53(5): 545-554.  
640
- 641 **Simone-Finstrom, M and D. Tarpy. 2018.** Honey Bee Queens Do Not Count Mates to Assess  
642 their Mating Success. *J. Insect Behav.* 31(2):200-209.  
643

644 **Spleen, A.M., E.J. Lengerich, K. Rennich, D. Caron, R. Rose, J.S. Pettis, M. Henson, J.T.**  
645 **Wilkes, M. Wilson, J. Stitzinger et al. 2013.** A national survey of managed honey bee 2011–  
646 2012 winter colony losses in the United States: Results from the Bee Informed Partnership. *J.*  
647 *Apic. Res.* 52: 44–53.

648

649 **Szabo, T. 1982.** Requeening honeybee colonies with queen cells. *J. Apic. Res.* 21(4): 208-211

650

651 **Tarpy, D. R., J. J. Keller, J.R. Caren, and D.A. Delaney. 2012.** Assessing the Mating 'Health'  
652 of Commercial Honey Bee Queens. *J. Econ. Entomol.* 105(1): 20-25.

653

654 **Tarpy, D. R., S. Hatch, S, and D. J. Fletcher. 2000.** The influence of queen age and quality  
655 during queen replacement in honeybee colonies. *Anim. Behav.* 59(1): 97-101.

656

657 **Van Alten, A., J. Tam and R. Bryans., Adapted by: L. Eccles, M. Kempers, D. Rawn, and**  
658 **B. Lacey. 2013.** The Ontario Introductory Queen Rearing Manual. Ontario Beekeepers  
659 Association, Technology Transfer Program. Guelph, Ontario. Self-published, 70pp.

660

661 **vanEngelsdorp, D, D. Cox Foster, and M. Frazier. 2007.** Fall-dwindle Disease: Investigations  
662 into the Causes of Sudden and Alarming Colony Losses Experienced by Beekeepers in the Fall  
663 of 2006. Preliminary Report: First Revision, 22 Harrisburg, PA, USA: Pennsylvania Department  
664 of Agriculture.

665

- 666 **VanEngelsdorp, D., D.R. Tarpy, F.J. Lengerich, and J.S. Pettis. 2013.** Idiopathic brood  
667 disease syndrome and queen events as precursors of colony mortality in migratory beekeeping  
668 operations in the eastern United States. *Prev. Vet. Med.* 108: 225–233  
669
- 670 **Winston, M. L. 1987.** *The Biology of the Honey Bee.* Harvard University Press. Cambridge,  
671 Mass, USA.  
672
- 673 **Woyke, J. 1984.** Correlation and interaction between population, length of worker life and  
674 honey production by honey bees in a temperate region. *J. Apic. Res.* 23:148-156.  
675
- 676 **(ZQ 2019). Zia Queens Bees 2019.** (<http://ziaqueenbees.com/queen-cells-nucs-equipment/>,  
677 accessed 20 Nov. 2019)
